# Supplementary material for: Short- and midterm outcome of ruptured and unruptured intracerebral wide-necked aneurysms with microsurgical treatment
Source: Springer Nature journal article supplement (doi:10.1038/s41598-021-84339-x), 2021-03-02

**Figure e-1.** Short- and midterm outcome of ruptured and unruptured intracerebral wide-necked aneurysms with microsurgical treatment. Sae-Yeon Won MD; Volker Seifert MD, PhD, Daniel Dubinski MD, MSc; Sepide Kashefiolasl MD; Nazife Dinc MD; Markus Bruder MD; Juergen Konczalla MD, PhD.

**A.** Patient with an unruptured wide neck aneurysm of media cerebral artery. **B.** Postoperative angiography with illustration of a filiform aneurysmal remnant of a size of 6.5mm. **C.** Angiography after 1 year follow-up showing spontaneous disappearance of the aneurysmal remnant.

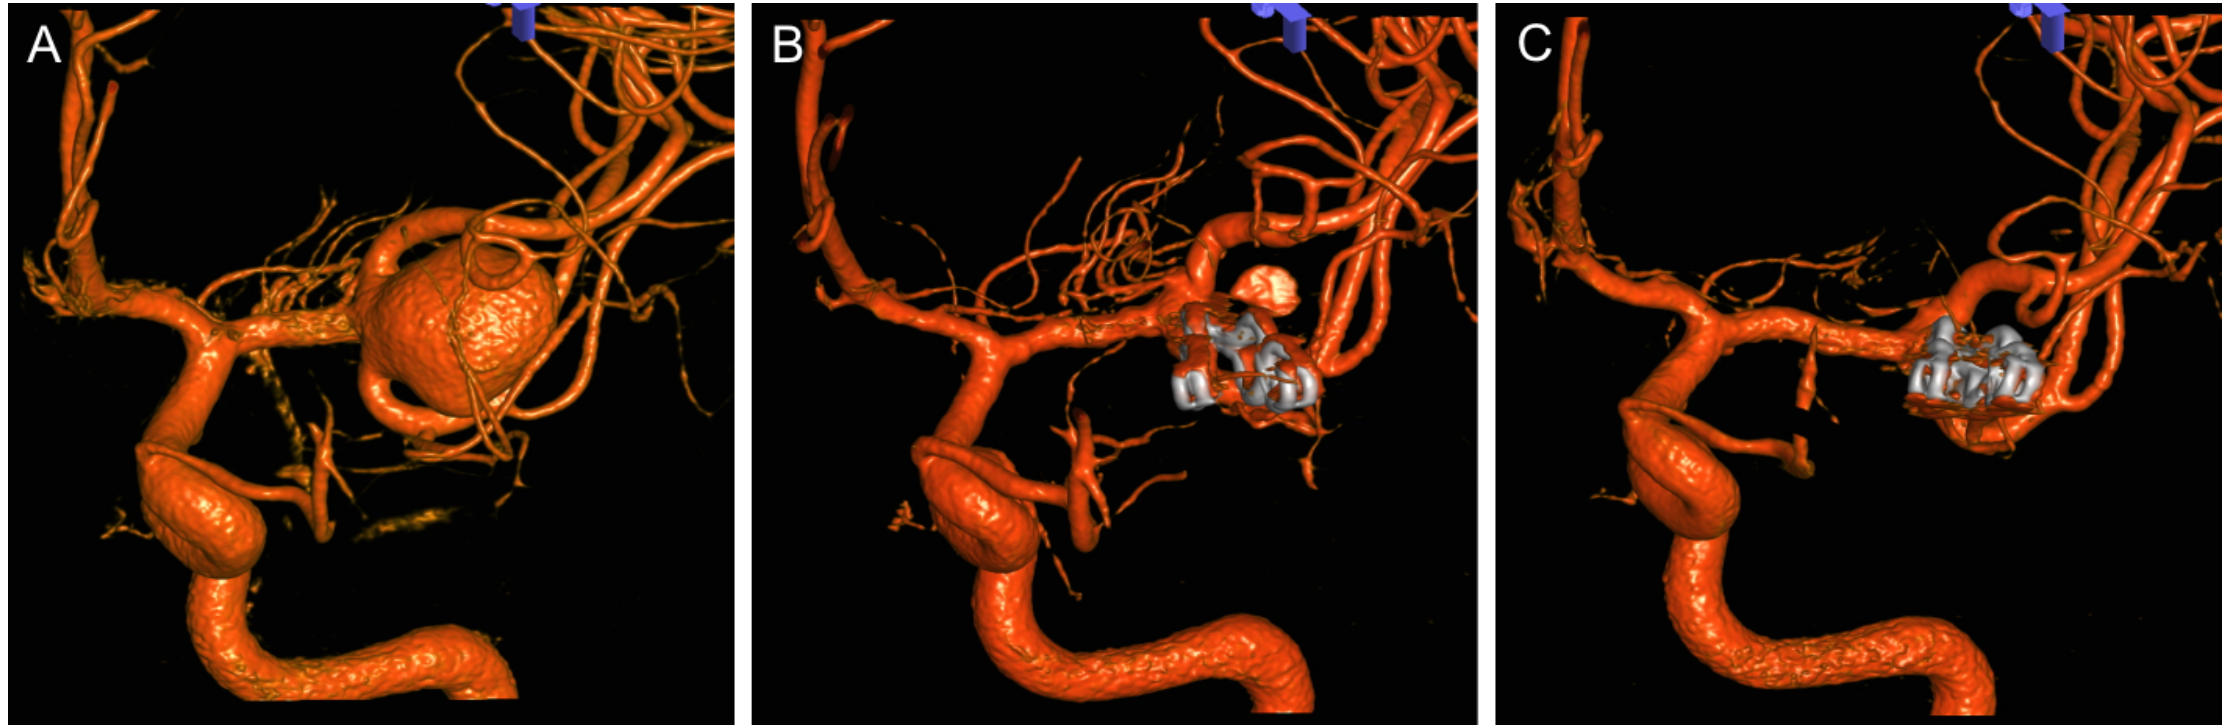

Supplement: MOESM3 [file 41598_2021_84339_MOESM3_ESM.pdf]
